# Supplementary material for: Characterization of a β-adrenergic-like octopamine receptor from the rice stem borer (Chilo suppressalis)
Source: Oxford University Press journal article supplement (doi:10.1242/jeb.068932), 2012-07-11
Supplement: jeb068932figs1-s3.pdf [file jeb068932figs1-s3.pdf]

5' AAGCGAAGCGT~~G~~CGAGATAAAGATCGCCACAT

ATG GAT CCC ATA AAC GGA TCC CAT AGC GGG GCG AAC GCG ACC ATC TCC GAT ATC ACA AAT 60  
 M D P I N G S H S G A N A T I S D I T N  
 GGC GCG TAC AAC GCC ACG GAC GCT GGC GAG TGG ACC AGC AGC GTC ATG TTC AAG CTG CCG 120  
 G A Y N A T D A G E W T S S V M F K L R  
 ACC TGC GTG CTG CTG CTC ATC GTC ATC ATG GCG GTG CTC GGC AAC ATG CTC GTC ATT GTC 180  
 T C V L L L I V I M A V L G N M L V I V  
 AGT GTT ATG AGG CAC AGG AAA CFC CGT GTC ATC ACC AAC TAC TTC GTC GTC TCC CTT GCG 240  
 S V M R H R K L R V I T N Y F V V S L A  
 TTT GCT GAC AIT CTC GTC GCG ATG GTG GIT ATG CCC TTC AAC TTC AGC GTG CAA TTC AAC 300  
 F A D I L V A M V V M P F N F S V Q F N  
 CAG GCG TGG GTC TTT GGG GAG ACG AIT TGT GAC CTC TGG AAC TCT TCC GAT GIT TAT TTT 360  
 Q G W V F G E T I C D L W N S S D V Y F  
 ACA TCA ACG TCC ATA CTC CAC CTC TGC TGC ATA TCC GTG GAT AGG TAT TAT GCC ATC GTG 420  
 T S T S I L H L C C I S V D R Y Y A I V  
 AAG CCG TTG AAG TAC CCC ATC AAG ATG ACA AAG AAG ATG GCG TTT GTG ATG TTA GCA GCG 480  
 K P L K Y P I K M T K K M A F V M L A A  
 ACG TGG TTG AGT CCA ATC ACA ATA TCT TAC GTC CCA ATA TTC ATG GGA TGG TAC ACA ACC 540  
 T W L S P I T I S Y V P I F M G W Y T T  
 ACA GAT TTT CTA GAG AGT CGC AGA GAC GAT CAG TGT GAG TTC AAA GIG AAC AAA CCT TAC 600  
 T D F L E S R R D D Q C E F K V N K P Y  
 GCA GTG ATA TCT AGC TCC ATA TCA TTC TGG ATA CCT TGC ACC ATC ATG ATA TTT ACG TAC 660  
 A V I S S S I S F W I P C T I M I F T Y  
 TTA GCG AIT TTC AAG GAG GCC AAC AGA CAG GAG AAG GCG TTG CAC GCT AGA GCC GCG AAC 720  
 L A I F K E A N R Q E K A L H A R A G N  
 GCC ATG TTG ATG CAC AGA CAT TCT AGA GAA GTG AGC GAT AAA AAT GGT GCA CTA CAT ATA 780  
 A M L M H R H S R E V S D K N G A L H I  
 AAC GCC ACC ACC CCA ACC AAA GAT AGA AAT TTA TTG AAG ATG AAG AGG GAG CAC AAA GCA 840  
 N A T T P T K D R N L L K M K R E H K A  
 GCC AGA ACT TTG GGA ATC ATC ATG GGA GCA TTC ATA CTT TGC TGG CTG CCA TTC TTC CTC 900  
 A R T L G I I M G A F I L C W L P F F L  
 TAC TAT GTG TCA ACA TCA TTG TGT GAC TCG TGC AAT TGC CCA GAA GTA GTG ACA GTG ATA 960  
 Y Y V S T S L C D S C N C P E V V T V I  
 ATG TTT TGG ACT GGG TAC TTC AAT TCC GCG TTG AAC CCT ATA ATA TAC GCG TAC TTT AAT 1020  
 M F W T G Y F N S A L N P I I Y A Y F N  
 AGA GAC TTT CGT AAT GCT TTT AAA AAT ACA TTA GCT TGC GCG TTC TGT AGT TTC TGC AAG 1080  
 R D F R N A F K N T L A C A F C S F C K  
 CGT AGT GCG TCA GAT TTA GAT GCA ATG GAA CGA TTA GAT AGA AGA GGA TOC GCG CAA CTG 1140  
 R S A S D L D A M E R L D R R G S A Q L  
 AGA GTG CCG ATA CCT TCG AGA AGA GCA TCG GAT TTG GCG TCG CTT TGA  
 R V P I P S R R A S D L A S L \*  
 ACTTCGAGCGAAACAATAGCCAGCCGTTTGAGG 3'

Fig.S.1

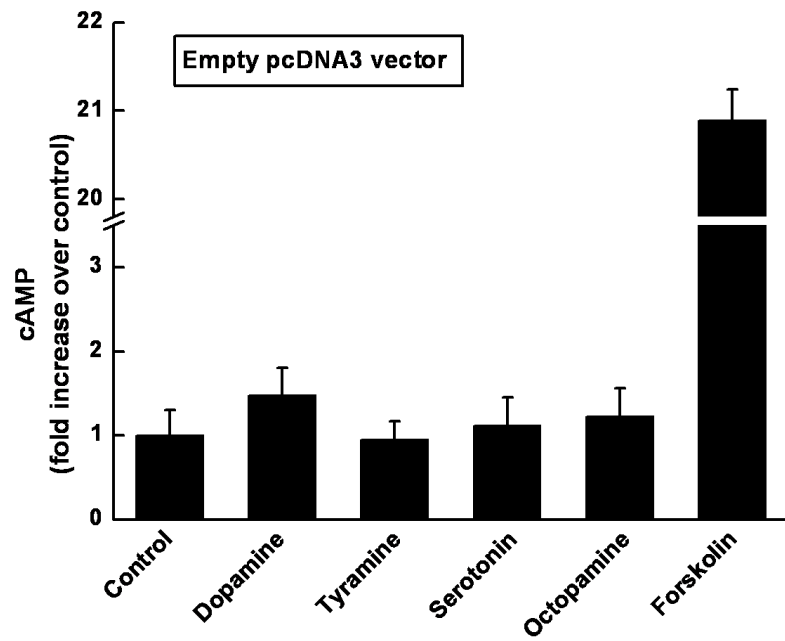

Fig.S.2

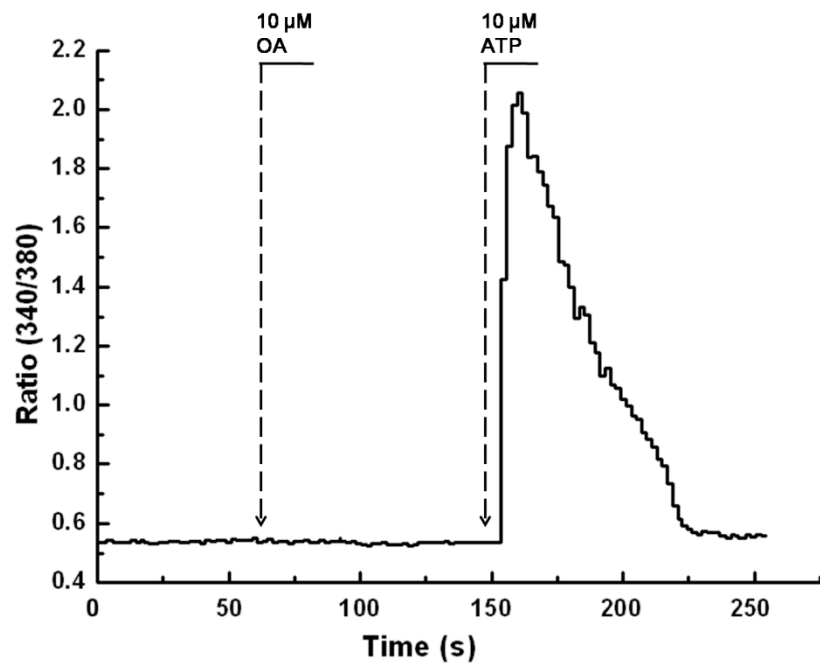

Fig.S.3
